# Supplementary material
Source: PubMed Central journal article supplement (PMC5473728)
Supplement: mmc1.pdf [file mmc1.pdf]

**The American Journal of Human Genetics, Volume 100**

**Supplemental Data**

**Defects in the Cell Signaling Mediator  $\beta$ -Catenin**

**Cause the Retinal Vascular Condition FEVR**

**Evangelia S. Panagiotou, Carla Sanjurjo Soriano, James A. Poulter, Emma C. Lord, Denisa Dzulova, Hiroyuki Kondo, Atsushi Hiyoshi, Brian Hon-Yin Chung, Yoyo Wing-Yiu Chu, Connie H.Y. Lai, Mark E. Tafoya, Dyah Karjosukarso, Rob W.J. Collin, Joanne Topping, Louise M. Downey, Manir Ali, Chris F. Inglehearn, and Carmel Toomes**

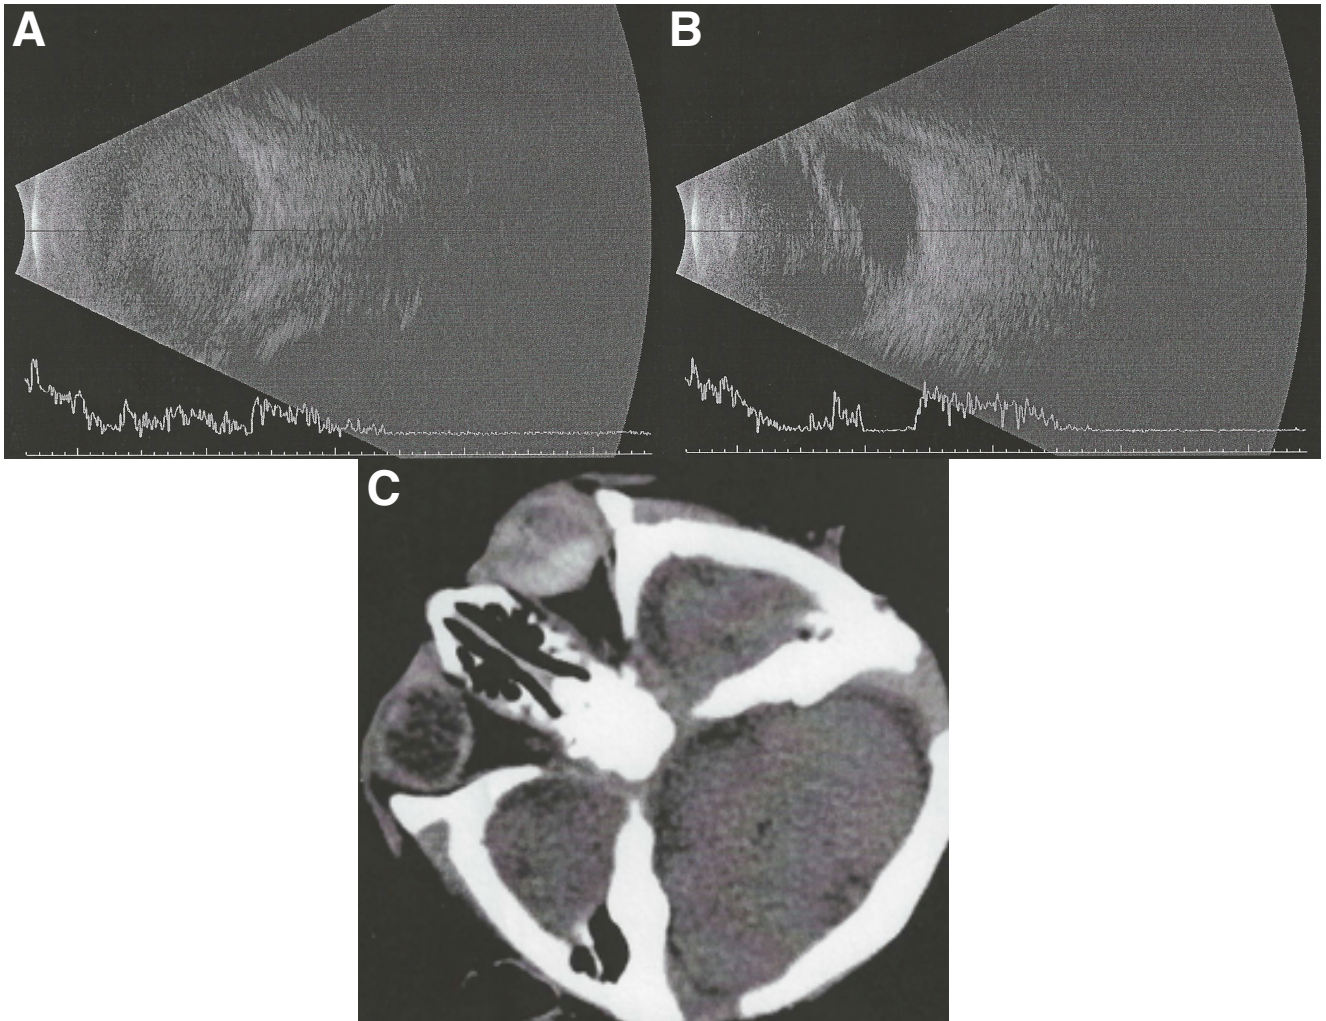

**Figure S1. Clinical appearance of the proband from family F1321 aged one month.** (A) Ultrasound biomicroscopy photograph of the left eye showing vitreous hemorrhage. (B) Ultrasound biomicroscopy photograph of the right eye showing a funnel-shaped retinal detachment and vitreous hemorrhage. (C) Computerized tomography scan of the brain showing hyper-dense left globe content and no acute intracranial hemorrhage.

|           |     | p.Arg710Cys |                                  |     |  |
|-----------|-----|-------------|----------------------------------|-----|--|
|           |     | ↓           |                                  |     |  |
| Human     | 700 | ----        | IGAQGEPLG-YRQDDPSYRSFHSG----     | 722 |  |
| Chimp     | 700 | ----        | IGAQGEPLG-YRQDDPSYRSFHSG----     | 722 |  |
| Monkey    | 700 | ----        | IGAQGEPLG-YRQDDPSYRSFHSG----     | 722 |  |
| Dog       | 700 | ----        | IGAQGEPLG-YRQDDPSYRSFHSG----     | 722 |  |
| Cow       | 700 | ----        | IGAQGEPLG-YRQDDPSYRSFHSG----     | 722 |  |
| Mouse     | 700 | ----        | IGAQGEALG-YRQDDPSYRSFHSG----     | 722 |  |
| Rat       | 700 | ----        | IGAQGEALG-YRQDDPSYRSFHSG----     | 722 |  |
| Chicken   | 700 | ----        | IGAQGEPLG-YRPDDPSYRSFHSG----     | 722 |  |
| Zebrafish | 699 | ----        | IGAQGEPLG-YRQDDPSYRSFHSG----     | 721 |  |
| Fruit fly | 714 |             | LQDMLGP EEAYEGLYGQGP SVHSSHGGRAF | 744 |  |
| Mosquito  | 712 |             | LQDILSPEQAYEGLYGQGP SVHSSHGGRAF  | 742 |  |
| Frog      | 700 | ----        | IGAQGEPLG-YRQDDPSYRSFHAP----     | 722 |  |

**Figure S2. Protein sequence alignment of human  $\beta$ -catenin with homologues.** Multiple protein

alignment was calculated using HomoloGene (<http://www.ncbi.nlm.nih.gov/homologene>) [Edgar, R.C.

(2004) *Nucleic Acids Res.* 32, 1792-7]. Thirty amino acid residues surrounding the p.Arg710Cys variant are

shown. Conserved amino acid residues are shaded. Accession numbers: Human NP\_001091679.1;

Chimpanzee XP\_001138023.1; Monkey NP\_001244847.1; Dog NP\_001131124.1; Cow NP\_001069609.1;

Mouse NP\_001159374.1; Rat NP\_445809.2; Chicken NP\_990412.1; Zebrafish NP\_571134.2; Fruit fly

(armadillo) NP\_996328.1; Mosquito (Arm\_Anoga) XP\_309245.5; Frog NP\_001016958.1.

A

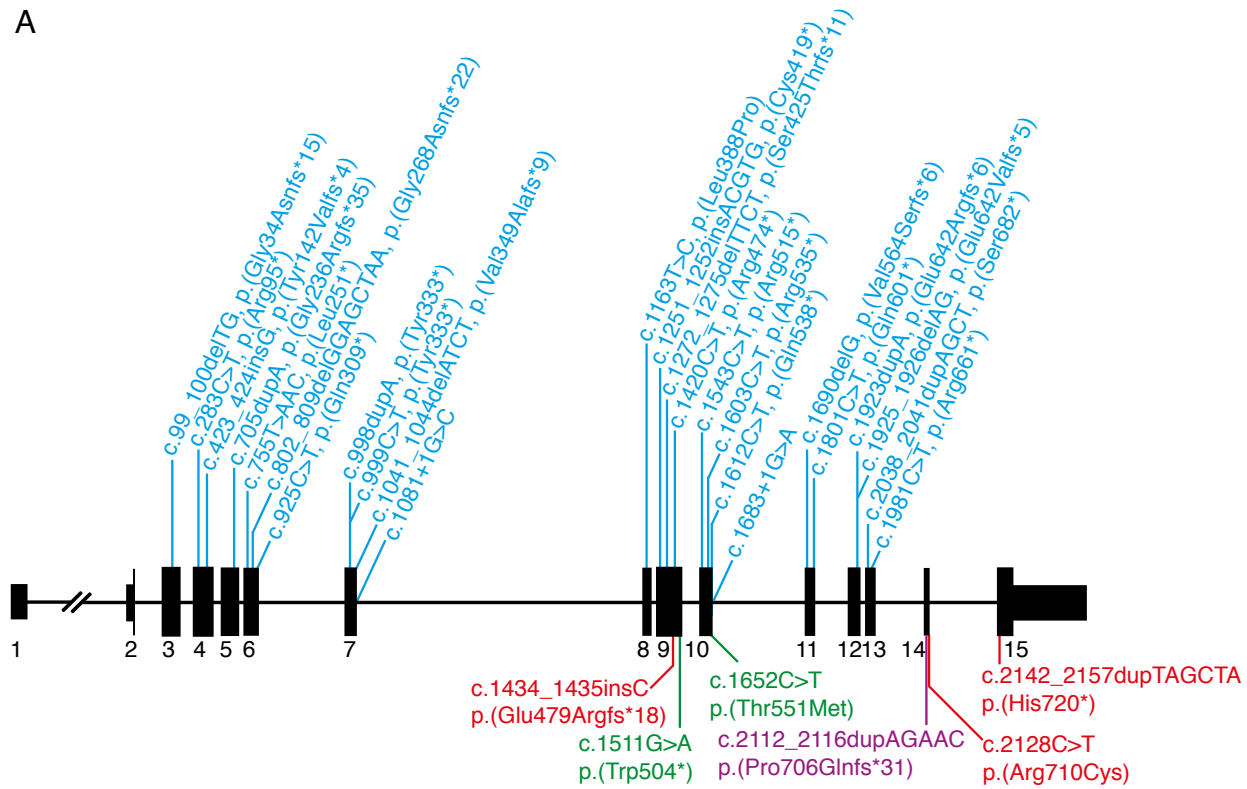

B

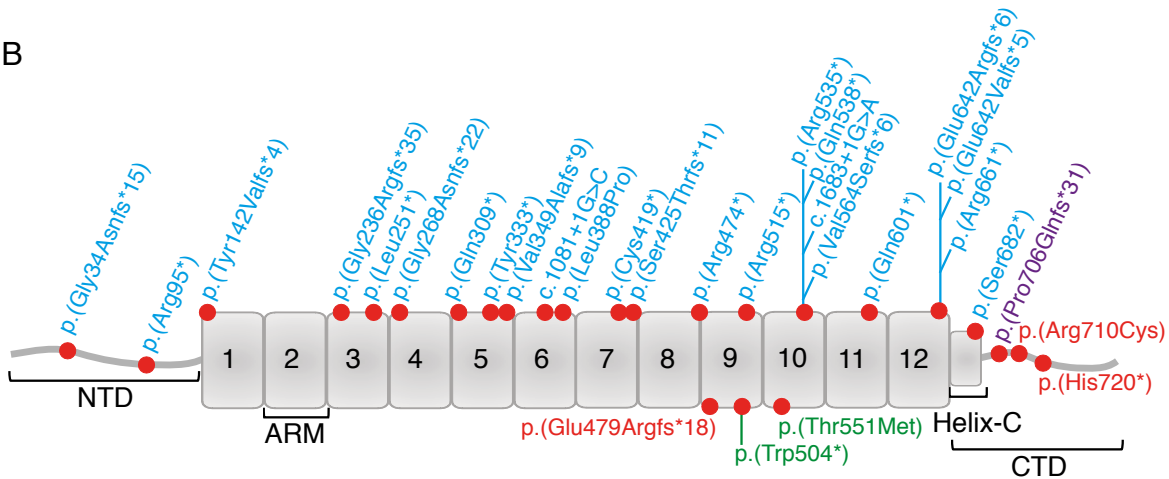

**Figure S3. Published intragenic heterozygous *CTNNB1* mutations causing syndromic intellectual disability (ID) and autism spectrum disorder (ASD).** Schematic representation of the *CTNNB1* gene and protein showing the location of *CTNNB1* mutations identified in individuals with ID syndrome (blue) and ASD (green) (de Ligt et al. 2012; O’Roak et al. 2012; Tucci et al. 2014; Kuechler et al. 2015; Kharbanda et al. 2017) alongside the mutations identified in the present study (red). The mutation in purple was identified in a child with ID syndrome but with an eye phenotype consistent with a diagnosis of FEVR (Dixon et al 2016). The amino-terminal domain (NTD) spans amino acids 1-137, 12 armadillo repeats (ARM) span amino acids 138-664, the carboxy-terminal domain (CTD) spans 667-781 and the Helix-C domain spans amino acids 667-683. All mutations are written using the standard recommended guidelines (<http://varnomen.hgvs.org>). The frameshift mutations reported in Kharbanda et al. 2017 (c.1038\_1044delGCTATCTinsGCT; c.1038\_1044delGCTATCTinsGCT; c.799\_809delGAAGGAGCTAAinsGAA) have therefore been changed to fit these standards.

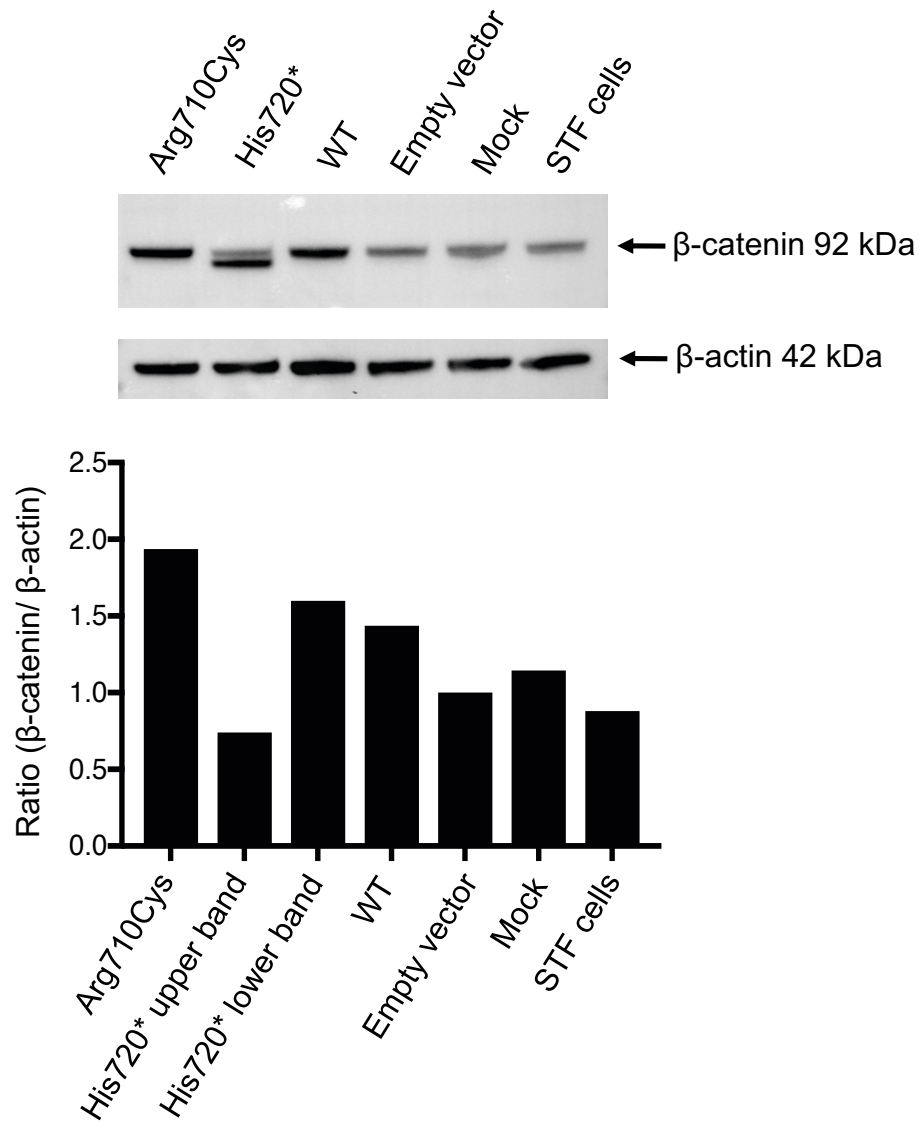

**Figure S4. Western blot analysis and quantitative densitometry to confirm the expression of the wildtype and mutant  $\beta$ -catenin constructs.** (A) Western blot of *CTNNB1* expression constructs. STF cells were transiently transfected with expression vectors for wild-type (WT) or mutant  $\beta$ -catenin (Arg710Cys or His720\*) or empty vector (pDEST40). Mock transfection (Mock) and untreated STF cells were additional controls. Forty-eight hours after transfection, whole cell lysates were prepared and subjected to western blot analysis with anti- $\beta$ -catenin polyclonal antibody (#9562 Cell Signalling Technology). Anti- $\beta$ -actin monoclonal antibody (A5441 Sigma Aldrich) was used as the loading control. (B) Western band intensities were measured using Image Lab 5.2.1 (Bio-Rad) and quantified relative to the cells transfected with empty vector. Results are shown as ratios to the loading control. Note that this experiment was only performed once and the samples are not normalized for transfection efficiency but to total number of cells.

**Table S1. *CTNNB1* primers for PCR/sequencing.**

| <b>Exon</b> | <b>Forward primer (5'-3')</b> | <b>Reverse primer (5'-3')</b> | <b>Size (bp)</b> |
|-------------|-------------------------------|-------------------------------|------------------|
| 2           | CAGGTATCCCAGTGACTTAGGAG       | GCAGAAAATGGAGCAAAGG           | 268              |
| 3&4         | TGCTTTTCTTGGCTGTCTTTC         | AGTTTTCAAGTACTGGTATTGGGT      | 913              |
| 5&6         | TGAAGTAAATGCTCAAGGGGA         | CCACAACCCATTCATGGAAA          | 758              |
| 7           | GCAAGCTGGCTGAAATTCTT          | TCAGTAGTTAAAGTTCTACCACCTTTT   | 351              |
| 8&9         | CAGAAGGACACCTCCTAAGGC         | CCCTATCGCAGCCATACTTC          | 761              |
| 10          | GCGATAGGGGTAAGATTCTGAAAT      | CTCTTCAGGAAGACGGATGG          | 411              |
| 11          | TTACGGGGAACCTTCGGGTAT         | TCATAAAATTAAATGTTGGTAACCC     | 345              |
| 12&13       | TGTGAATGCCTCTTGCACTC          | CAATGCAAATGAATGTGTACTAAGTG    | 569              |
| 14          | TTGTTCCCTTTTGTAATCTGAAAGTATG  | CTGCCAACACTGGTTTCCC           | 267              |
| 15          | TTTGGATGCCCTAACCTCAG          | TAGCCTAAACCACTCCCACC          | 419              |

| <b>Mutation</b>                     | <b>PolyPhen2</b>               | <b>MutationTaster</b>                          | <b>CADD*</b> |
|-------------------------------------|--------------------------------|------------------------------------------------|--------------|
| c.1434_1435insC<br>p.Glu479Argfs*18 | N/A                            | Disease causing (prediction probability 1)     | Score 35     |
| c.2128C>T<br>p.Arg710Cys            | Possibly damaging (score 0.54) | Disease causing (prediction probability 0.999) | Score 25.4   |
| c.2142_2157 dup<br>p.His720*        | N/A                            | Disease causing (prediction probability 1)     | Score 35     |

**Table S2. Summary of bioinformatics analyses undertaken to predict the pathogenic nature of the *CTNNB1* mutations.** URLs: PolyPhen2, <http://genetics.bwh.harvard.edu/pph2/> [Adzhubei, I.A. et al. (2010). Nat. Methods 7, 248-9]; Mutationtaster, <http://www.mutationtaster.org/> [Schwarz, J.M. et al. (2010). Nat. Methods 7, 575-6]; Scaled CADD (Combined Annotation Dependent Depletion) scores generated using version 1.3 <http://cadd.gs.washington.edu> [Kircher, M. et al. (2014). Nat. Genet. 46, 310-5]. \*Scaled CADD scores of 20 means that the variant is amongst the top 1% of deleterious variants in the human genome and a score of 30 means that the variant is in the top 0.1%.
